# Supplementary material for: The key role of microtubules in hypoxia preconditioning-induced nuclear translocation of HIF-1α in rat cardiomyocytes
Source: PeerJ. 2017 Aug 14;5:e3662. doi: 10.7717/peerj.3662 (PMC5560226; doi:10.7717/peerj.3662)
Supplement: Data S1 [file peerj-05-3662-s001.xlsx]

## Sheet: fig-1( raw data )
group		number	relative fluorescent intensity		group		number	relative fluorescent intensity		group		number	relative fluorescent intensity
Duration hypoxia 1 hour	Hyoxia（H）	1	0.83		Duration hypoxia 3 hour	Hyoxia（H）	1	0.67		Duration hypoxia 6 hour	Hyoxia（H）	1	0.47
Duration hypoxia 1 hour		2	0.81		Duration hypoxia 3 hour		2	0.51		Duration hypoxia 6 hour		2	0.41
Duration hypoxia 1 hour		3	0.74		Duration hypoxia 3 hour		3	0.55		Duration hypoxia 6 hour		3	0.43
Duration hypoxia 1 hour		4	0.79		Duration hypoxia 3 hour		4	0.62		Duration hypoxia 6 hour		4	0.46
Duration hypoxia 1 hour		5	0.71		Duration hypoxia 3 hour		5	0.61		Duration hypoxia 6 hour		5	0.51
Duration hypoxia 1 hour		6	0.78		Duration hypoxia 3 hour		6	0.62		Duration hypoxia 6 hour		6	0.32
Duration hypoxia 1 hour		7	0.82		Duration hypoxia 3 hour		7	0.54		Duration hypoxia 6 hour		7	0.44
Duration hypoxia 1 hour		8	0.76		Duration hypoxia 3 hour		8	0.65		Duration hypoxia 6 hour		8	0.35
Duration hypoxia 1 hour		9	0.79		Duration hypoxia 3 hour		9	0.66		Duration hypoxia 6 hour		9	0.46
Duration hypoxia 1 hour	colchicine(HC)	1	0.54		Duration hypoxia 3 hour	colchicine(HC)	1	0.43		Duration hypoxia 6 hour	colchicine(HC)	1	0.23
Duration hypoxia 1 hour		2	0.53		Duration hypoxia 3 hour		2	0.41		Duration hypoxia 6 hour		2	0.23
Duration hypoxia 1 hour		3	0.48		Duration hypoxia 3 hour		3	0.38		Duration hypoxia 6 hour		3	0.28
Duration hypoxia 1 hour		4	0.54		Duration hypoxia 3 hour		4	0.32		Duration hypoxia 6 hour		4	0.22
Duration hypoxia 1 hour		5	0.65		Duration hypoxia 3 hour		5	0.45		Duration hypoxia 6 hour		5	0.25
Duration hypoxia 1 hour		6	0.51		Duration hypoxia 3 hour		6	0.38		Duration hypoxia 6 hour		6	0.28
Duration hypoxia 1 hour		7	0.45		Duration hypoxia 3 hour		7	0.37		Duration hypoxia 6 hour		7	0.37
Duration hypoxia 1 hour		8	0.43		Duration hypoxia 3 hour		8	0.38		Duration hypoxia 6 hour		8	0.28
Duration hypoxia 1 hour		9	0.51		Duration hypoxia 3 hour		9	0.41		Duration hypoxia 6 hour		9	0.21
Duration hypoxia 1 hour	pacliaxel 5umol/L（HT5）	1	0.78		Duration hypoxia 3 hour	pacliaxel 5umol/L（HT5）	1	0.74		Duration hypoxia 6 hour	pacliaxel 5umol/L（HT5）	1	0.54
Duration hypoxia 1 hour		2	0.76		Duration hypoxia 3 hour		2	0.62		Duration hypoxia 6 hour		2	0.52
Duration hypoxia 1 hour		3	0.78		Duration hypoxia 3 hour		3	0.63		Duration hypoxia 6 hour		3	0.53
Duration hypoxia 1 hour		4	0.81		Duration hypoxia 3 hour		4	0.52		Duration hypoxia 6 hour		4	0.42
Duration hypoxia 1 hour		5	0.78		Duration hypoxia 3 hour		5	0.65		Duration hypoxia 6 hour		5	0.45
Duration hypoxia 1 hour		6	0.78		Duration hypoxia 3 hour		6	0.62		Duration hypoxia 6 hour		6	0.32
Duration hypoxia 1 hour		7	0.81		Duration hypoxia 3 hour		7	0.66		Duration hypoxia 6 hour		7	0.36
Duration hypoxia 1 hour		8	0.77		Duration hypoxia 3 hour		8	0.63		Duration hypoxia 6 hour		8	0.63
Duration hypoxia 1 hour		9	0.76		Duration hypoxia 3 hour		9	0.53		Duration hypoxia 6 hour		9	0.53
Duration hypoxia 1 hour	pacliaxel 10umol/L（HT10）	1	0.92		Duration hypoxia 3 hour	pacliaxel 10umol/L（HT10）	1	0.75		Duration hypoxia 6 hour	pacliaxel 10umol/L（HT10）	1	0.75
Duration hypoxia 1 hour		2	0.94		Duration hypoxia 3 hour		2	0.83		Duration hypoxia 6 hour		2	0.73
Duration hypoxia 1 hour		3	0.84		Duration hypoxia 3 hour		3	0.84		Duration hypoxia 6 hour		3	0.75
Duration hypoxia 1 hour		4	0.87		Duration hypoxia 3 hour		4	0.87		Duration hypoxia 6 hour		4	0.71
Duration hypoxia 1 hour		5	0.81		Duration hypoxia 3 hour		5	0.81		Duration hypoxia 6 hour		5	0.68
Duration hypoxia 1 hour		6	0.93		Duration hypoxia 3 hour		6	0.91		Duration hypoxia 6 hour		6	0.72
Duration hypoxia 1 hour		7	0.94		Duration hypoxia 3 hour		7	0.85		Duration hypoxia 6 hour		7	0.75
Duration hypoxia 1 hour		8	1.04		Duration hypoxia 3 hour		8	0.86		Duration hypoxia 6 hour		8	0.71
Duration hypoxia 1 hour		9	1.04		Duration hypoxia 3 hour		9	0.88		Duration hypoxia 6 hour		9	0.68
Duration hypoxia 1 hour	pacliaxel 15umol/L（HT15）	1	1.21		Duration hypoxia 3 hour	pacliaxel 15umol/L（HT15）	1	0.97		Duration hypoxia 6 hour	pacliaxel 15umol/L（HT15）	1	0.87
Duration hypoxia 1 hour		2	1.03		Duration hypoxia 3 hour		2	0.95		Duration hypoxia 6 hour		2	0.85
Duration hypoxia 1 hour		3	1.12		Duration hypoxia 3 hour		3	0.95		Duration hypoxia 6 hour		3	0.85
Duration hypoxia 1 hour		4	1.21		Duration hypoxia 3 hour		4	0.97		Duration hypoxia 6 hour		4	0.77
Duration hypoxia 1 hour		5	1.16		Duration hypoxia 3 hour		5	0.9		Duration hypoxia 6 hour		5	0.79
Duration hypoxia 1 hour		6	1.08		Duration hypoxia 3 hour		6	0.94		Duration hypoxia 6 hour		6	0.94
Duration hypoxia 1 hour		7	1.05		Duration hypoxia 3 hour		7	1.05		Duration hypoxia 6 hour		7	1.05
Duration hypoxia 1 hour		8	1.05		Duration hypoxia 3 hour		8	1.05		Duration hypoxia 6 hour		8	0.85
Duration hypoxia 1 hour		9	1.21		Duration hypoxia 3 hour		9	1.11		Duration hypoxia 6 hour		9	1.11

## Sheet: fig-2(raw date)
group	number	relative fluorescent intensity
control group（con）	1	0.98
	2	1
	3	1.1
	4	0.92
	5	1.03
	6	0.96
	7	0.99
	8	1.01
	9	1.02
Hyoxia（H）	1	0.45
	2	0.44
	3	0.52
	4	0.39
	5	0.43
	6	0.38
	7	0.44
	8	0.43
	9	0.42
hypoxia preconditioning（HPC）	1	0.76
	2	0.67
	3	0.77
	4	0.68
	5	0.67
	6	0.64
	7	0.67
	8	0.65
	9	0.54
hypoxia preconditioning+pacliaxel(HPC+HT)	1	1.02
	2	1.01
	3	1.04
	4	0.83
	5	0.96
	6	0.95
	7	0.96
	8	0.92
	9	0.94

## Sheet: fig-4(raw date)
	N	HC	HPC	H	HT5	HT10	HT15	HPC+HT10
	0.36	0.13	0.72	0.62	0.3	0.44	0.25	1.39
	0.34	0.14	0.77	0.68	0.44	0.46	0.27	1.23
	0.39	0.12	0.74	0.71	0.45	0.4	0.33	1.3

## Sheet: Table-1(raw date)
group	number	LDH	ADP	ATP	PK	HK	PFK	ROS
control group（con）	1	123	5	26	11	14	21	2.3
	2	231	4	27	12	14	23	2.5
	3	325	5	25	13	15	21	1.6
	4	245	4	26	15	16	21	2.5
	5	231	5	27	14	15	19	3.2
	6	261	5	28	15	13	21	3.1
	7	116	4	25	13	17	22	1.9
	8	432	5	26	15	15	23	2.1
	9	346	5	24	11	17	19	2.5
	10	321	4	26	13	15	19	2.1
	11	274	5	25	14	16	21	2.5
	12	243	6	27	15	17	22	2.4
Hyoxia（H）	1	1564	15	10	543	143	167	8.4
	2	1456	15	12	436	125	156	6.5
	3	1768	16	11	456	136	167	7.8
	4	1875	17	11	521	126	178	8.3
	5	1345	16	12	457	167	187	7.6
	6	1567	15	13	512	165	167	7.3
	7	1678	15	11	456	167	178	7.8
	8	1658	14	10	523	145	189	7.1
	9	1789	13	13	435	134	196	7.8
	10	1678	15	12	467	123	167	8.5
	11	1789	14	12	436	111	178	8.6
	12	1789	14	12	512	125	178	6.8
hypoxia preconditioning（HPC）	1	678	12	19	678	132	221	3.4
	2	789	11	18	645	134	198	3.3
	3	984	12	19	678	134	213	4.3
	4	567	13	17	567	154	221	4.1
	5	936	12	18	736	134	217	4.2
	6	847	13	16	712	154	206	3.9
	7	857	14	18	745	134	215	3.7
	8	768	13	20	685	123	231	4
	9	679	12	18	647	112	216	4.1
	10	567	12	19	658	145	215	4.2
	11	765	13	19	736	123	229	3.8
	12	678	12	20	765	125	203	3.8
pacliaxel 5umol/L（HT5）	1	1134	14	13	797	113	134	6.3
	2	1240	14	11	898	134	178	5.7
	3	1230	14	13	789	143	145	6.4
	4	996	11	11	879	134	156	6.1
	5	889	11	14	765	141	164	6.4
	6	1087	12	13	698	134	146	6.3
	7	1073	13	12	789	156	145	6.3
	8	1147	13	13	778	135	154	6.7
	9	1274	11	13	798	154	157	6.1
	10	965	11	14	812	163	156	6.3
	11	1076	13	13	824	145	154	6.3
	12	956	11	14	811	143	165	6.1
pacliaxel 10umol/L（HT10）	1	989	14	15	897	156	201	4.7
	2	1140	14	15	986	145	178	5.2
	3	1230	13	16	987	163	177	5
	4	896	14	16	923	156	189	4.5
	5	789	13	15	879	156	178	4.9
	6	987	13	14	879	145	176	5.1
	7	1023	13	16	867	157	189	5.6
	8	947	14	17	856	145	167	5.6
	9	974	13	14	879	156	178	5.4
	10	865	14	15	845	145	187	5.2
	11	876	13	16	789	156	167	4.9
	12	756	14	16	768	154	187	5.2
pacliaxel 15umol/L（HT15）	1	1109	13	11	897	143	123	6.4
	2	1240	14	10	654	113	114	6.1
	3	1130	15	11	567	135	134	6.2
	4	1432	14	12	654	143	156	6.4
	5	1045	16	9	675	156	165	6.7
	6	1024	17	9	675	143	114	6.2
	7	1023	16	7	677	135	134	6.2
	8	1024	18	12	657	123	145	6.2
	9	1212	18	11	678	114	154	6.3
	10	1105	17	12	765	134	135	6.1
	11	998	16	11	734	134	143	6.1
	12	756	16	11	567	134	156	6.2
hypoxia preconditioning+pacliaxel(HPC+HT)	1	654	6	22	1213	189	234	3.5
	2	546	5	23	1109	211	265	3.2
	3	435	7	24	1023	234	265	3.5
	4	416	6	21	956	211	256	3.5
	5	508	6	23	1098	203	247	3.2
	6	207	5	24	1123	198	276	3.2
	7	343	6	26	1213	201	285	3.7
	8	412	6	23	1156	189	278	2.1
	9	325	5	22	1106	205	265	2.3
	10	215	5	21	1211	211	260	3.5
	11	342	6	25	987	198	271	3.2
	12	321	7	24	1087	211	264	3.5

## Sheet: Sheet1
细胞内
N	HC	HPC	H	HT5	HT10	HT15	HPC+HT10		内	外	内/外
0.09	0.11	0.71	0.89	0.73	0.87	0.64	0.91	N	0.09	0.25	0.36
0.13	0.09	0.72	0.78	0.69	0.88	0.65	0.97	HC	0.11	=J4/L4	0.13
0.15	0.11	0.73	0.81	0.65	0.83	0.67	0.93	HPC	0.71	0.633929	1.12
								H	0.61	0.983871	0.62
细胞内/外								HT5	0.33	1.1	0.3
N	HC	HPC	H	HT5	HT10	HT15	HPC+HT10	HT10	0.46	1.04545	0.44
0.36	0.13	0.72	0.62	0.3	0.44	0.25	1.39	HT15	0.24	0.96	0.25
0.34	0.14	0.77	0.68	0.44	0.46	0.27	1.23	HPC+HT10	0.91	0.654676	1.39
0.39	0.12	0.74	0.71	0.45	0.4	0.33	1.3

## Sheet: Sheet2
	内	外	内/外
N	0.09	0.25	0.36
HC	0.11	0.85	0.13				0.09	0.11	0.71	0.61	0.29	0.46	0.24	0.91
HPC	0.71	0.63	1.12				0.08	0.12	0.73	0.62	0.27	0.42	0.21	0.87
H	0.61	0.98	0.62				0.08	0.11	0.69	0.58	0.26	0.39	0.19	0.93
HT5	0.29	0.96	0.3
HT10	0.46	1.05	0.44
HT15	0.24	0.96	0.25
HPC+HT10	0.91	0.65	1.39
N	0.08	0.24	0.34
HC	0.12	0.86	0.14
HPC	0.73	0.68	1.08
H	0.62	0.91	0.68
HT5	0.27	0.61	0.44
HT10	0.42	0.91	0.46
HT15	0.21	0.78	0.27
HPC+HT10	0.87	0.71	1.23
N	0.08	0.21	0.39
HC	0.11	0.92	0.12
HPC	0.69	0.61	1.13
H	0.58	0.82	0.71
HT5	0.26	0.58	0.45
HT10	0.39	0.97	0.4
HT15	0.19	0.58	0.33
HPC+HT10	0.93	0.72	1.3

## Sheet: fig-3（raw date）
group	number	HIF1-a nuclear relative fluorescent intensity	HIF1-a胞浆
Hyoxia（H）	1	0.24	0.44	0.545455	0.55			0.55	0.58	0.74	0.61	0.78	0.79	0.63	0.81	0.81
	2	0.34	0.59	0.576271	0.58			0.28	0.17	0.22	0.23	0.36	0.34	0.16	0.25	0.3
	3	0.32	0.43	0.744186	0.74			1.59	1.66	1.4	1.31	1.27	1.3	1.23	1.25	1.25
	4	0.31	0.51	0.607843	0.61			0.76	0.8	0.72	0.6	0.68	0.62	0.64	0.66	0.61
	5	0.36	0.46	0.782609	0.78			0.72	0.65	0.68	0.69	0.66	0.65	0.86	0.8	0.81
	6	0.38	0.48	0.791667	0.79			0.54	0.5	0.63	0.58	0.59	0.56	0.63	0.53	0.52
	7	0.34	0.54	0.62963	0.63			2.3	1.79	2.17	2.62	2.89	1.98	1.85	2	2.21
	8	0.43	0.53	0.811321	0.81
	9	0.42	0.52	0.807692	0.81
HC	1	0.05	0.18	0.277778	0.28
	2	0.03	0.18	0.166667	0.17
	3	0.05	0.23	0.217391	0.22
	4	0.06	0.26	0.230769	0.23
	5	0.08	0.22	0.363636	0.36
	6	0.08	0.23	0.347826	0.34
	7	0.04	0.25	0.16	0.16
	8	0.06	0.24	0.25	0.25
	9	0.08	0.27	0.296296	0.3
	9	0.06	0.29	0.206897	0.21
HPC	1	0.89	0.56	1.58929	1.59
	2	0.78	0.47	1.65957	1.66
	3	0.71	0.51	1.39216	1.4
	4	0.84	0.64	1.3125	1.31
	5	0.79	0.62	1.27419	1.27
	6	0.74	0.57	1.29825	1.3
	7	0.81	0.66	1.22727	1.23
	8	0.71	0.57	1.24561	1.25
	9	0.65	0.51	1.27451	1.25
	9	0.83	0.54	1.53704	1.54
HT5	1	0.31	0.41	0.756098	0.76
	2	0.36	0.45	0.8	0.8
	3	0.41	0.57	0.719298	0.72
	4	0.38	0.64	0.59375	0.6
	5	0.42	0.62	0.677419	0.68
	6	0.43	0.64	0.671875	0.62
	7	0.36	0.57	0.631579	0.64
	8	0.45	0.68	0.661765	0.66
	9	0.43	0.71	0.605634	0.61
	9	0.46	0.78	0.589744	0.6
HT10	1	0.56	0.78	0.717949	0.72
	2	0.51	0.79	0.64557	0.65
	3	0.48	0.71	0.676056	0.68
	4	0.44	0.64	0.6875	0.69
	5	0.49	0.74	0.662162	0.66
	6	0.51	0.79	0.64557	0.65
	7	0.72	0.84	0.857143	0.86
	8	0.62	0.78	0.794872	0.8
	9	0.64	0.79	0.810127	0.81
	9	0.61	0.76	0.802632	0.8
HT15	1	0.41	0.76	0.539474	0.54
	2	0.38	0.77	0.493506	0.5
	3	0.39	0.62	0.629032	0.63
	4	0.41	0.71	0.577465	0.58
	5	0.42	0.72	0.583333	0.59
	6	0.37	0.67	0.552239	0.56
	7	0.45	0.72	0.625	0.63
	8	0.41	0.78	0.525641	0.53
	9	0.37	0.71	0.521127	0.52
	9	0.45	0.69	0.652174	0.65
HPC+HT10	1	0.94	0.41	2.29268	2.3
	2	0.84	0.47	1.78723	1.79
	3	0.91	0.42	2.16667	2.17
	4	0.89	0.34	2.61765	2.62
	5	0.87	0.38	2.28947	2.89
	6	0.89	0.45	1.97778	1.98
	7	0.85	0.46	1.84783	1.85
	8	0.86	0.43	2	2
	9	0.95	0.43	2.2093	2.21
	9	0.93	0.49	1.89796	1.9
